# Supplementary material for: Pd-loaded In2O3 nanowire-like network synthesized using carbon nanotube templates for enhancing NO2 sensing performance
Source: Royal Society of Chemistry journal article supplement (doi:10.1039/c4ra14580a), 2015-01-01
Supplement: c4ra14580a1.pdf [file c4ra14580a1.pdf]

Electronic Supplementary Information (ESI)

**Pd-loaded In<sub>2</sub>O<sub>3</sub> nanowire-like network synthesized by CNTs  
templates for enhancing NO<sub>2</sub> sensing performance**

Mingqi. Huang <sup>[a]</sup>, Zhenduo. Cui <sup>[a]</sup>, Xianjin. Yang <sup>[a, b]</sup>, Shengli. Zhu <sup>[a, b]</sup>, Zhaoyang. Li <sup>[a, b]</sup>,

Yanqin. Liang \* <sup>[a, b]</sup>

<sup>[a]</sup> School of Materials Science and Engineering, Tianjin University, Tianjin 300072, China

<sup>[b]</sup> Tianjin Key Laboratory of Composite and Functional Materials, Tianjin 300072, China

\*Corresponding Author

E-Mail: [yqliang@tju.edu.cn](mailto:yqliang@tju.edu.cn)

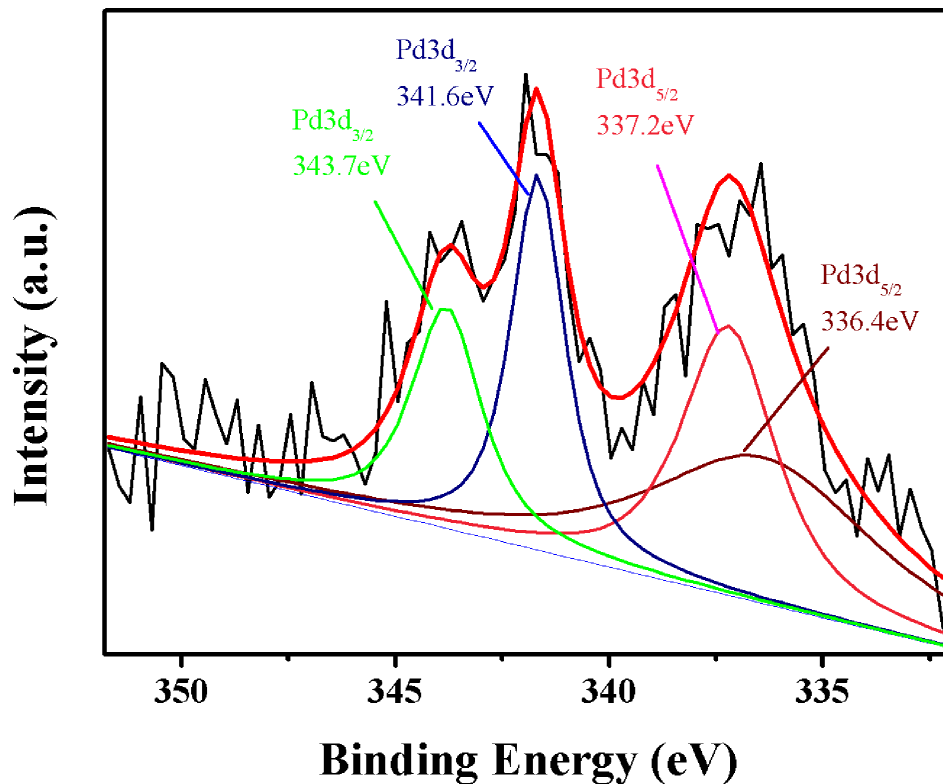

Figure S1. Pd3d XPS spectra of Pd-In<sub>2</sub>O<sub>3</sub> nanowire-like network.

The high-resolution scan of the Pd3d was shown in Fig. S1. The peaks located at 341.6 and 337.2 eV are assigned to Pd3d<sub>3/2</sub>, Pd3d<sub>5/2</sub> of PdO<sub>x</sub>/Pd, respectively, and a small peak with a binding energy of 336.4 eV corresponds to Pd3d<sub>5/2</sub> of PdO, proving that partial palladium has been oxidized at 550 °C. Moreover, the peak at 343.7 eV is assigned to Pd3d<sub>3/2</sub> of residual PdCl<sub>2</sub>, which was from the process of activation. The signal is weak because of low Pd content.

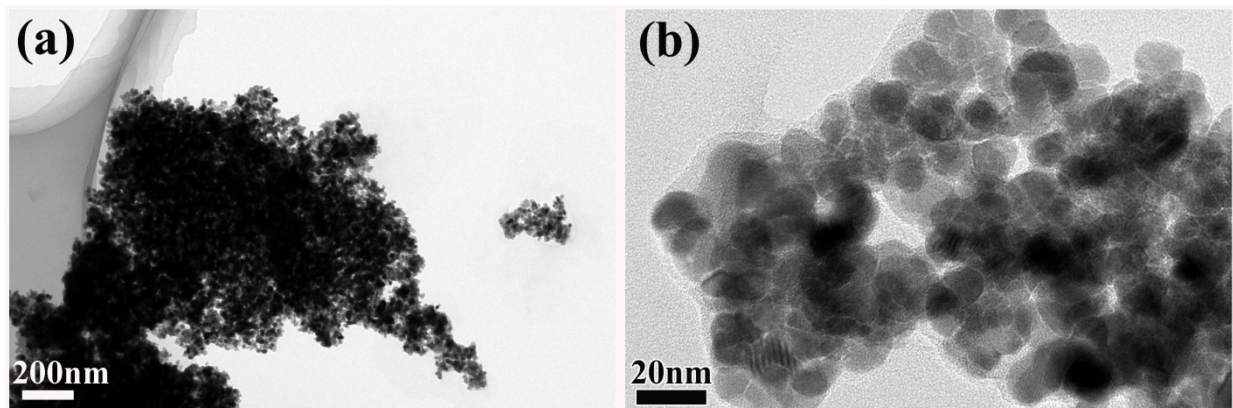

Figure S2. TEM images of porous unloaded-In<sub>2</sub>O<sub>3</sub>: (a) low magnification, and (b) high magnification for the observation of size and structure.

Figure S2 shows the sample obtained by electroless using CNTs as templates and followed by calcination in the absence of activation by PdCl<sub>2</sub>. As can be seen, lots of single crystals were stacked together and the morphology of unloaded-In<sub>2</sub>O<sub>3</sub> duplicated that of CNT, forming a porous structure. It is noteworthy that the morphology and grain size (about 20 nm) of porous unloaded In<sub>2</sub>O<sub>3</sub> is basically the same as that of porous Pd-In<sub>2</sub>O<sub>3</sub> shown in Figure 5a.

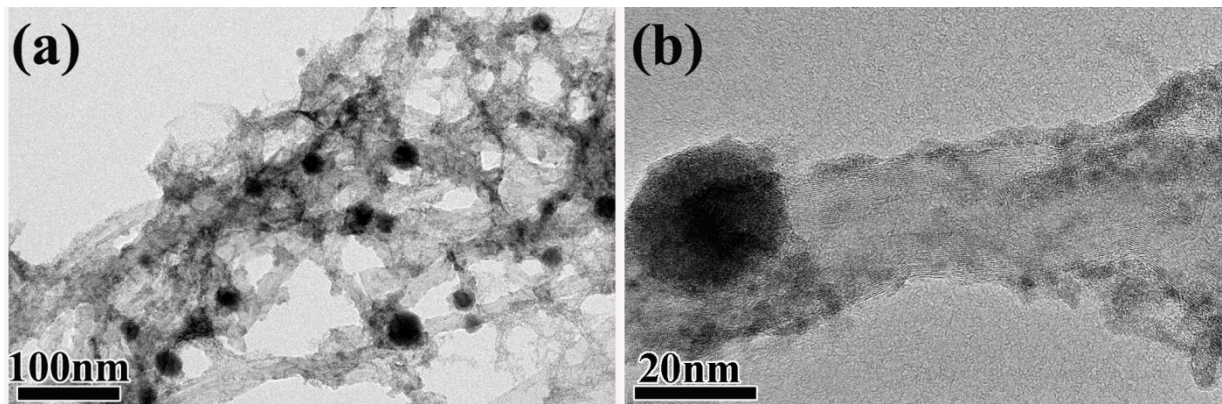

Figure S3. TEM Images of precursor (In/CNTs) obtained by sensitization and electroless plating, but without activation by  $\text{PdCl}_2$ : (a) TEM image, and (b) HRTEM image of an individual In/CNT.

Figure S3 shows the images of In/CNTs obtained by sensitization and electroless plating, but without activation by  $\text{PdCl}_2$ . Due to the lack of the activation of Pd, indium (In) deposition on the surface of CNTs (In/CNTs) exhibited inhomogeneity and aggregation, and large amounts of amorphous In reduced by  $\text{NaBH}_4$  was scattered around the CNTs. After oxidization and calcination, porous unloaded- $\text{In}_2\text{O}_3$  was obtained due to the crystallization of In loaded on the surface of CNTs.

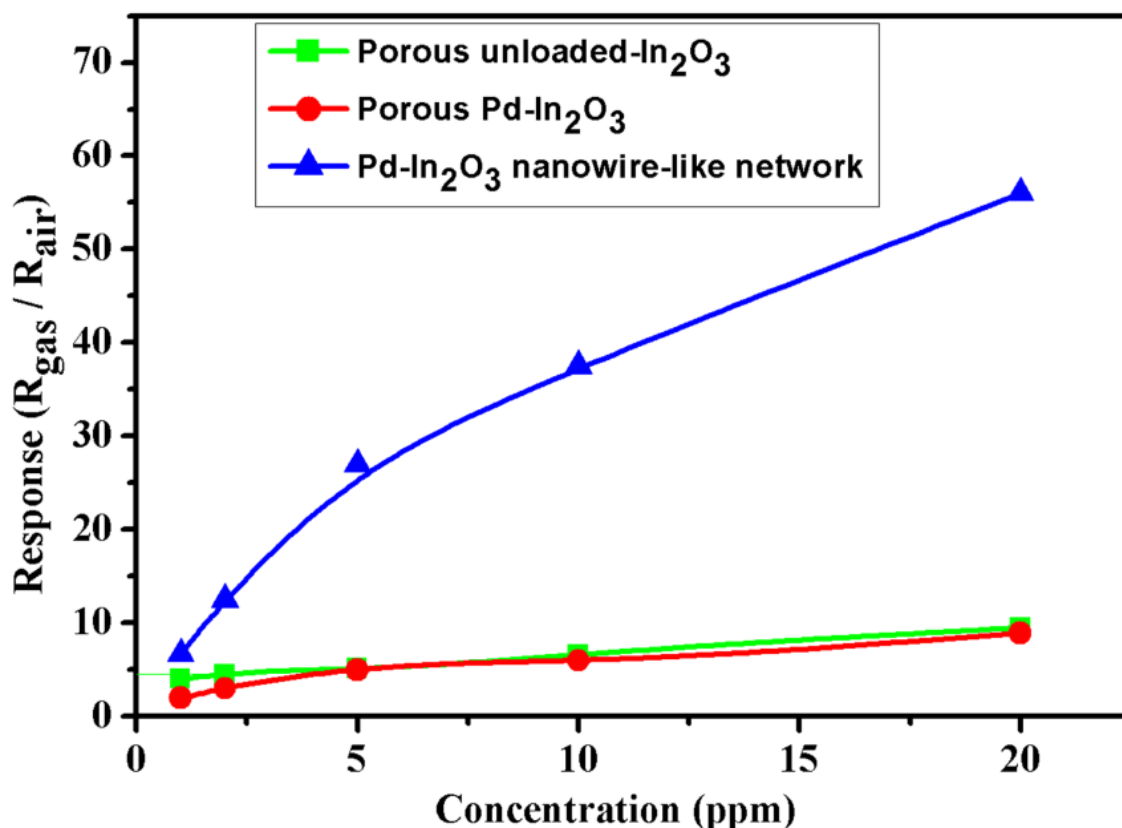

Figure S4. Gas response of three In<sub>2</sub>O<sub>3</sub>-based sensors exposed to NO<sub>2</sub> at concentrations ranging from 1 to 20 ppm at optimum operating time (110 °C).

Figure S4 shows the correlation of gas response with NO<sub>2</sub> concentration. Porous unloaded-In<sub>2</sub>O<sub>3</sub> and porous Pd-In<sub>2</sub>O<sub>3</sub> sensors have the similar response at various concentrations. In addition, the response of Pd-In<sub>2</sub>O<sub>3</sub> nanowire-like network sensor is much higher than that of the other two sensors. And Pd-In<sub>2</sub>O<sub>3</sub> network also has a faster rising tendency with the increasing of NO<sub>2</sub> concentration.

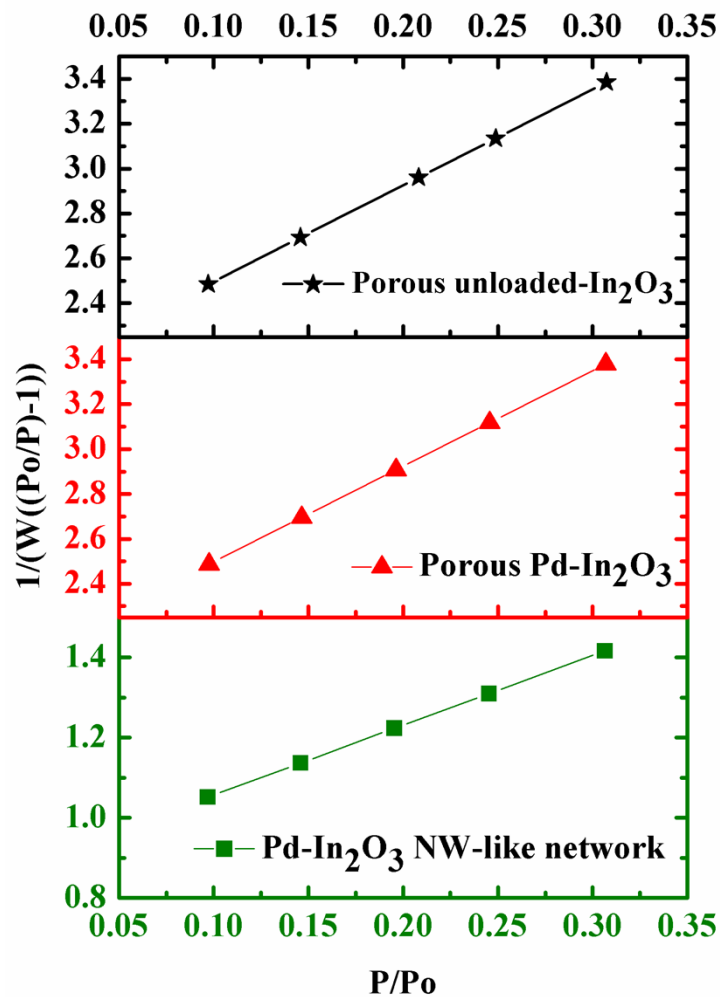

Figure S5 5-point BET surface area plots of three sensors. ( $W$  is the quantity of adsorbed  $\text{NO}_2$ .  $P$  and  $P_0$  are the equilibrium and the saturation pressure of the adsorbate, respectively.)

Figure S5 shows the 5-point BET surface area plots of three sensors, by which the BET surface areas were calculated. The results indicate that nanowire-like network sensor presents much higher surface to volume ratio than that of the other two sensors. This is a major reason why nanowire-like network sensor possesses very high response.

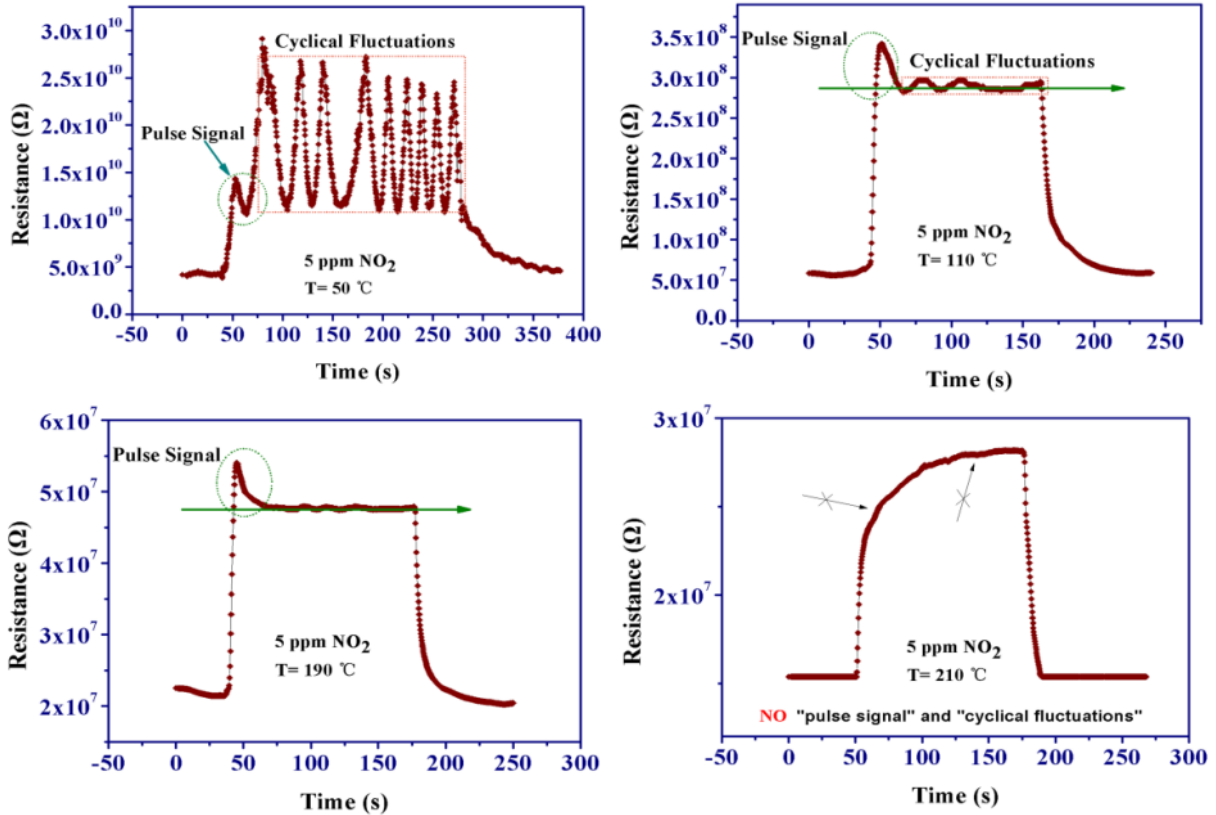

Figure S6 Typical dynamic response curves of the porous Pd-In<sub>2</sub>O<sub>3</sub> sensor exposed to 5 ppm NO<sub>2</sub> at different temperatures.

Figure S6 revealed the response curves of porous Pd-In<sub>2</sub>O<sub>3</sub>. It has the same trend of variability as that of Pd-In<sub>2</sub>O<sub>3</sub> NW-like network. The changing process can be divided into three steps: 1) the amplitude of fluctuation drastically decreased until it was lower than that of “pulse signal”. 2) The “cyclical fluctuations” disappeared firstly. 3) Both of “pulse signal” and “cyclical fluctuations” were missing.

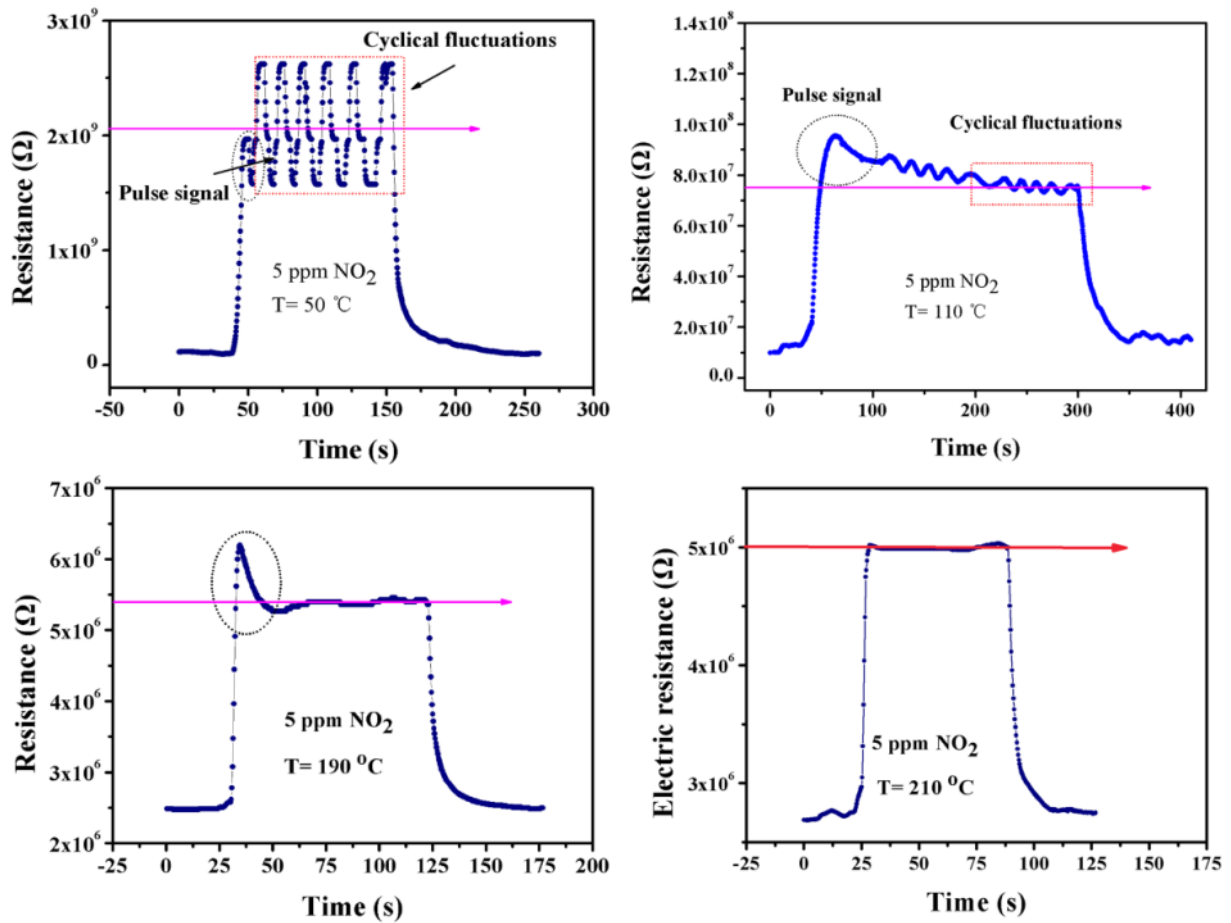

Figure S7. Dynamic response curves of the original Pd-In<sub>2</sub>O<sub>3</sub> nanowire-like network sensor prepared 3 month ago for stability testing.

Figure S7 shows the dynamic response curves of the original Pd-In<sub>2</sub>O<sub>3</sub> nanowire-like network sensor prepared 3 months ago. After storing in a small centrifugal tube for 3 months, this sample shows the unchangeable gas sensing property, such as response, response/recovery time, and almost the same change of two novel characteristics. This demonstrates that the as-obtained Pd-In<sub>2</sub>O<sub>3</sub> nanowire-like network sensor has excellent stability.



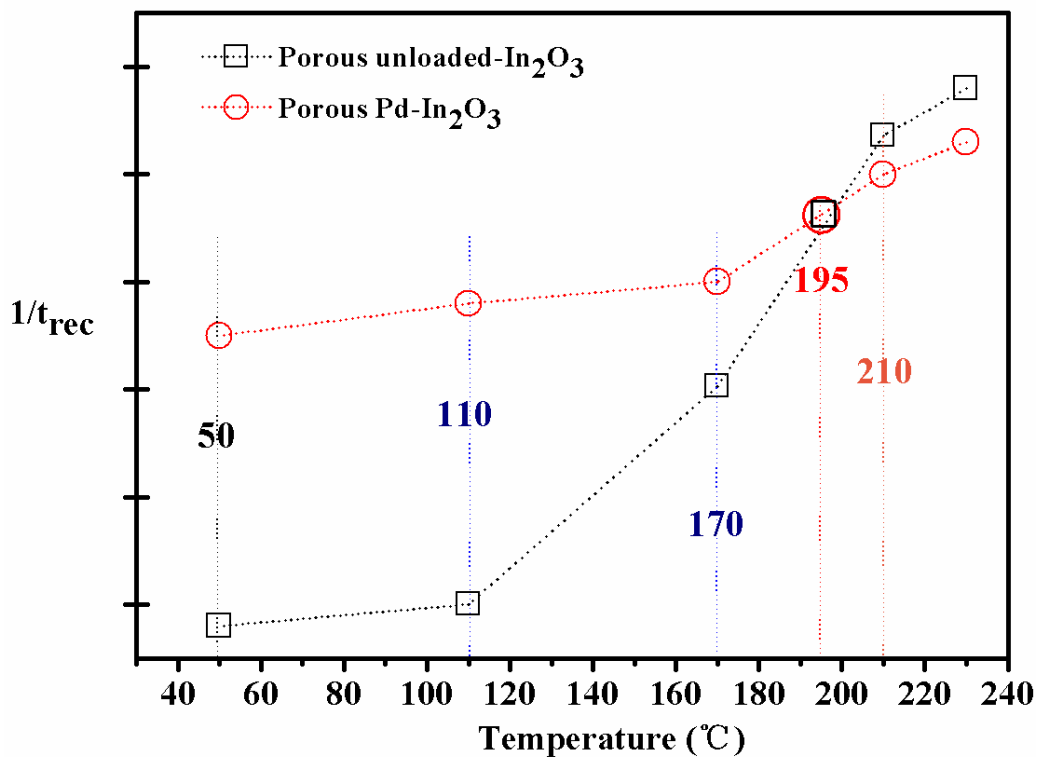

Figure S8. Dependence of the sensor recovery rates on operating temperature of porous unloaded-In<sub>2</sub>O<sub>3</sub> and porous Pd- In<sub>2</sub>O<sub>3</sub>.

Because of the similar specific surface area of porous unloaded-In<sub>2</sub>O<sub>3</sub> and porous Pd-In<sub>2</sub>O<sub>3</sub>, the reciprocal of recovery time was utilized to represent the recovery rate per unit area. As shown in Figure S8, the recovery rate of unloaded In<sub>2</sub>O<sub>3</sub> presents much sensitive to temperature. When temperature exceeds 195 °C, the recovery rate of porous unloaded-In<sub>2</sub>O<sub>3</sub> is faster than that of porous Pd-In<sub>2</sub>O<sub>3</sub>. This proved that Pd-loaded In<sub>2</sub>O<sub>3</sub> and unloaded-In<sub>2</sub>O<sub>3</sub> had their own gas sensing mechanisms.
